# Supplementary material for: Assessing different next-generation sequencing technologies for wastewater-based epidemiology
Source: bioRxiv or medRxiv preprint supplement (doi:10.1101/2024.05.22.24306666), 2024-05-23
Supplement: Supplementary file [file media-1.pdf]

## Supplementary

(a)

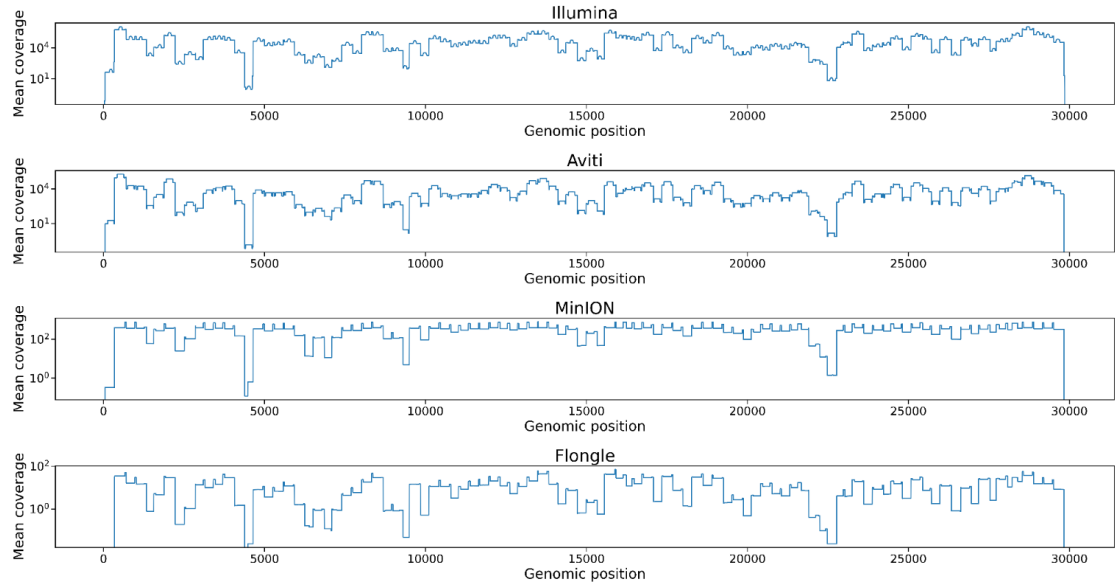

(b)

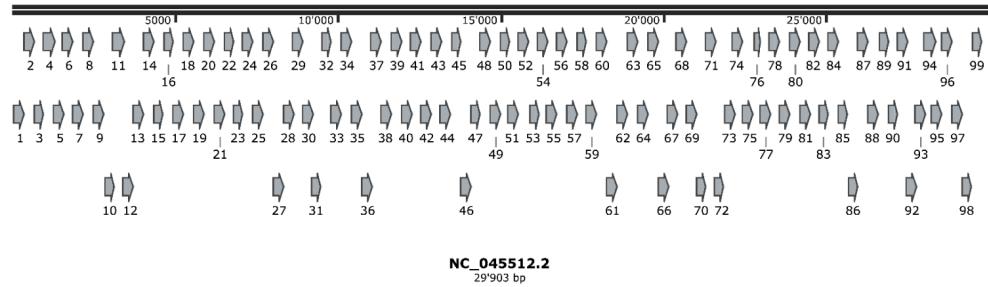

**Supplementary Figure A: (a)** Positional coverage of the SARS-Cov-2 (NC\_045512.2) by sequencing technology. **(b)** Schematic representation of the distribution of the amplicons resulting from the v4.1 ARTIC primers over the SARS-Cov-2 genome (NC\_045512.2).

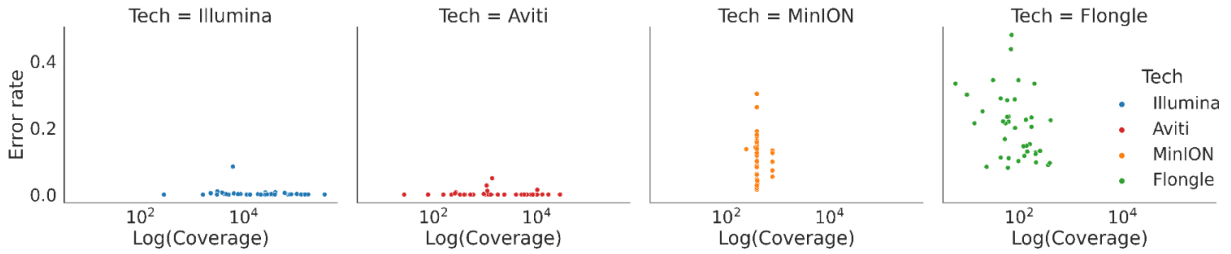

**Supplementary Figure B: Per position error rate by Log(Coverage).** Error rates were estimated from the non-diluted samples of the spike-in experiments, where the expected relative abundance of BA.1 is 1.0. Only positions corresponding to BA.1 signature mutations were considered. For more details see Methods.

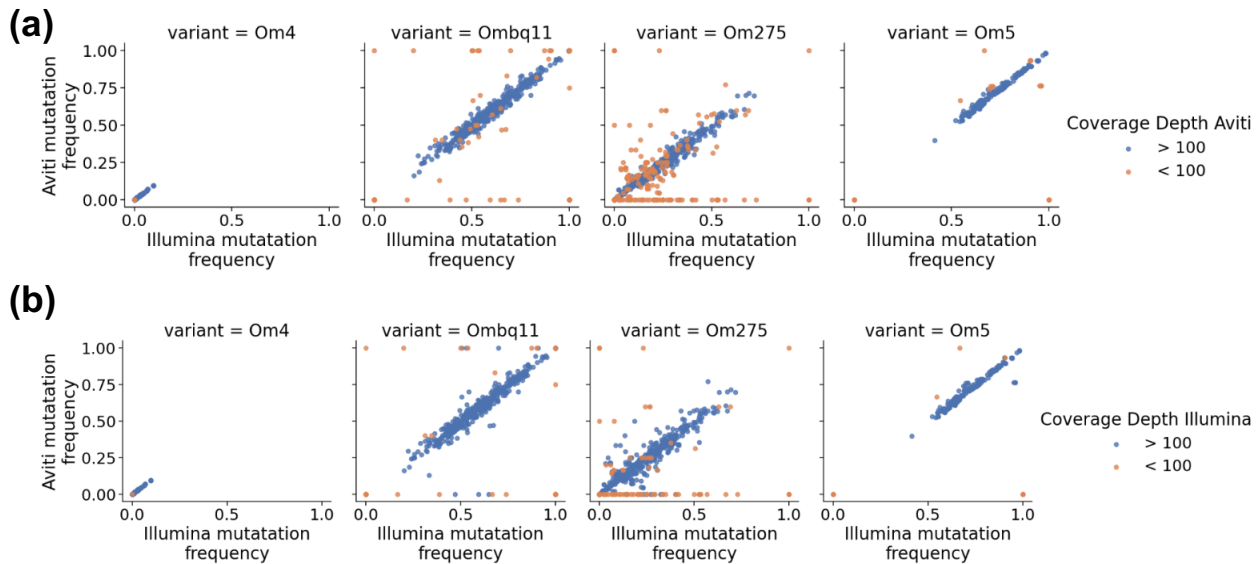

**Supplementary Figure C: Mutation frequencies of variant defining mutations compared between Illumina and Aviti by variant and coverage depth.** Each dot represents a unique mutation for the respective variant for one wastewater sample. Dots are coloured by (a) Aviti coverage depth or (b) Illumina coverage depth at the respective mutation position.

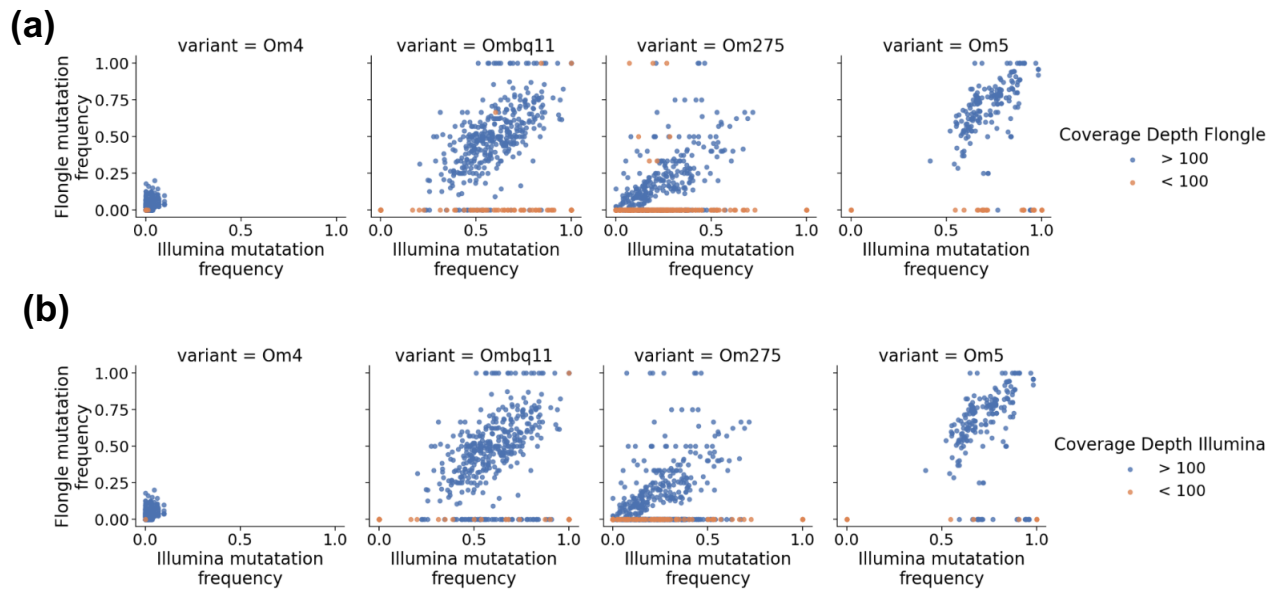

**Supplementary Figure D: Mutation frequencies of variant defining mutations compared between Illumina and MinION by variant and coverage depth.** Each dot represents a unique mutation for the respective variant for one wastewater sample. Dots are coloured by (a) MinION coverage depth or (b) Illumina coverage depth at the respective mutation position.

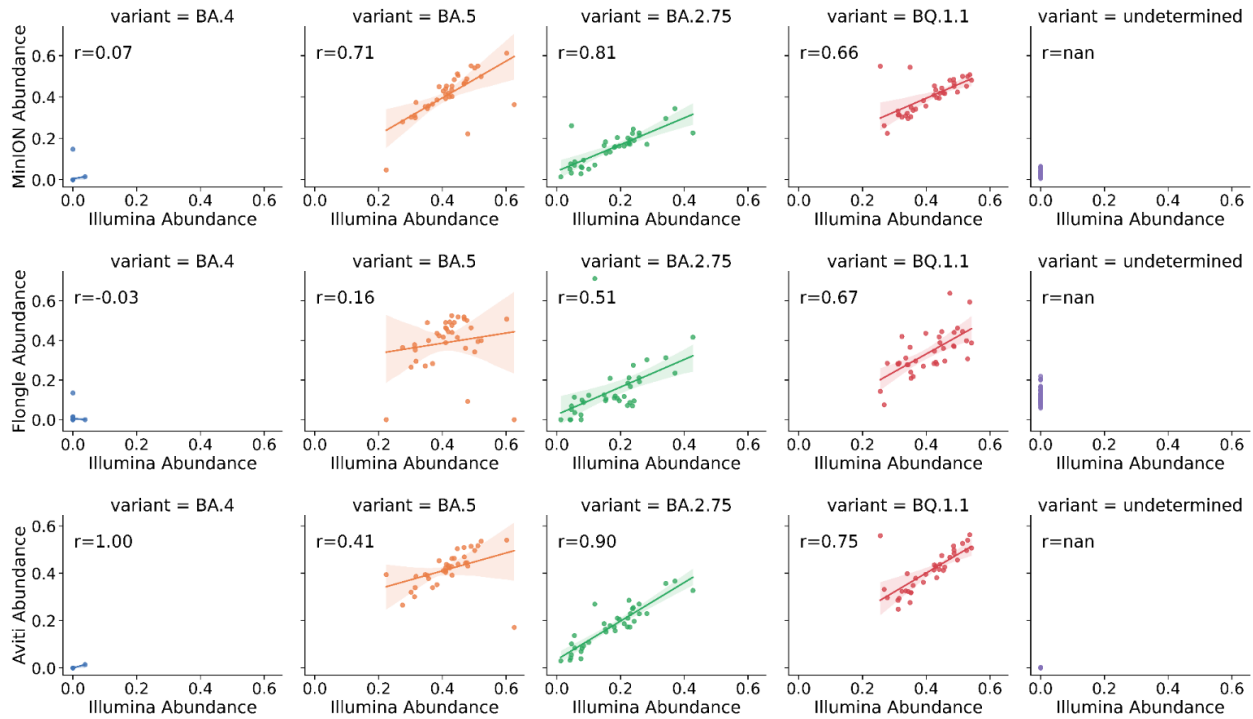

**Supplementary Figure E: Correlation of variant abundance estimations of the sequencing technologies of interest to Illumina-based variant abundance estimations by variant.** Each dot represents the estimated abundance of a given variant for one wastewater sample. The abundances were estimated using LolliPop. The r-squared values represent the  $R^2$ -statistic, deduced by squaring the respective Pearson correlation coefficient. The line through the points represents the estimated linear regression on the points and the shaded area the corresponding 95% confidence interval. Mutations that cannot be classified to a defined variant, are categorized as “undetermined” by LolliPop.

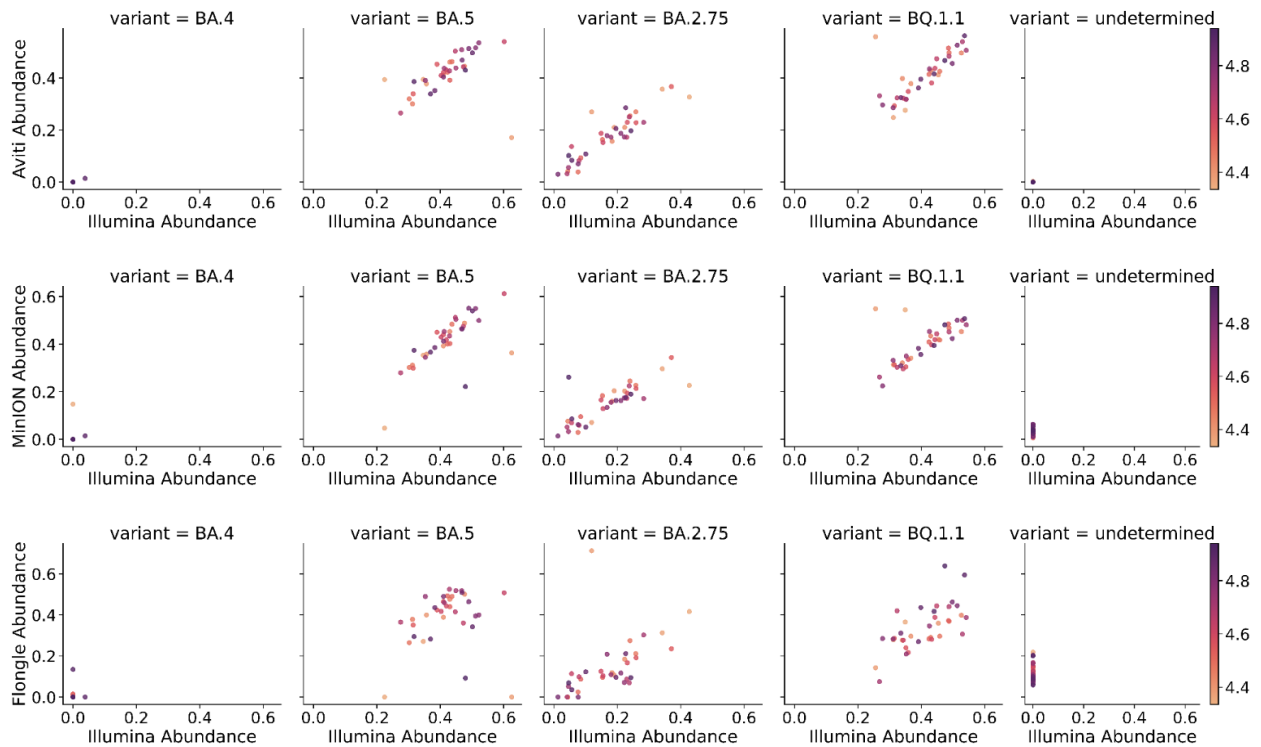

**Supplementary Figure F: Correlation of variant abundance estimations of the sequencing technologies of interest to Illumina-based variant abundance estimations by variant and mean sample coverage.** Each dot represents the estimated abundance of a given variant for one wastewater sample. Dots are coloured by the  $\log(\text{mean coverage})$  of the respective sample. Dark purple corresponds to a high coverage, light yellow to a low coverage. The abundances were estimated using LolliPop. Mutations that cannot be classified to a defined variant, are categorized as “undetermined” by LolliPop.

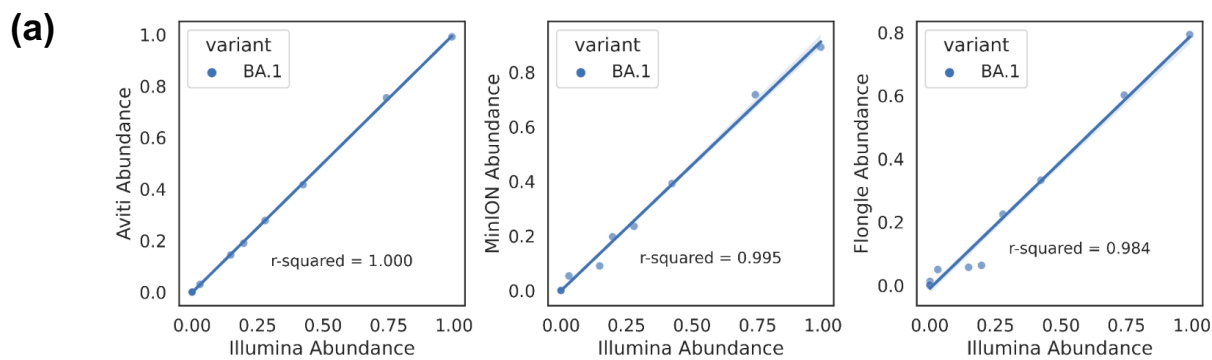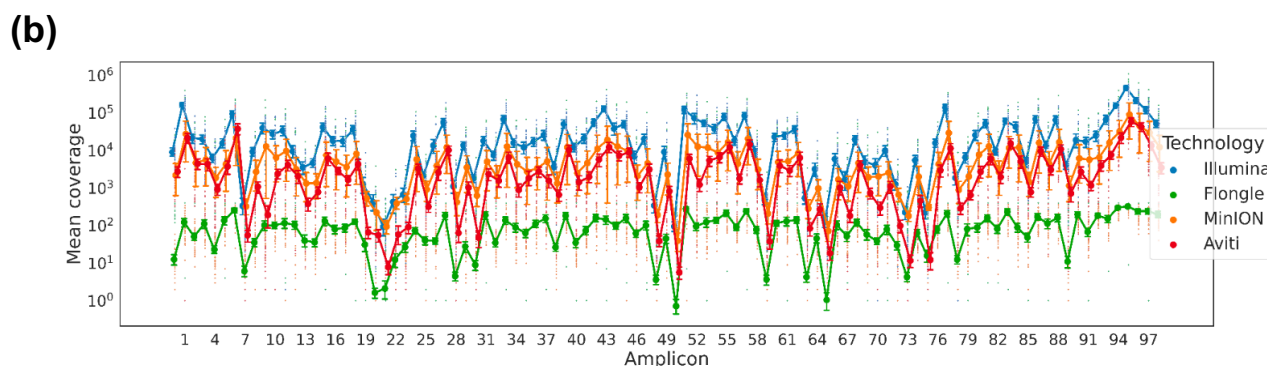

**Supplementary Figure G: (a) Comparison of variant abundance estimations by sequencing technologies of interest vs. Illumina.** Each dot represents the estimated abundance of a given variant for one wastewater sample. The abundances were estimated using LolliPop. The r-squared values represent the  $R^2$ -statistic, deduced by squaring the respective Pearson correlation coefficient. The line through the points represents the estimated linear regression on the points and the shaded area the corresponding 95% confidence interval. **(b) Mean amplicon coverage distribution for the sequencing technologies of interest.** The amplicons for all sequencing technologies were generated using v4.1 ARTIC primers. For each amplicon the mean coverage of the different sequencing technologies is represented by a large dot. The smaller dots represent the individual coverage depth of each nucleotide position of the amplicon. The vertical line at each amplicon represents the inter-quartile range of the coverage values ( $\pi = 50$ ).

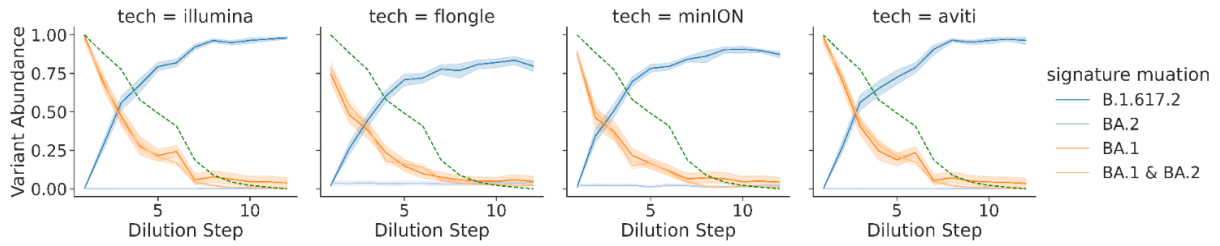

**Supplementary Figure H: Mutation frequency of BA.1 (Om1) defining mutations compared to expected BA.1 abundance.** For each sequencing technology, three technical replicates were provided. The bold line represents the mean abundance estimation of a given variant; the shaded area gives the 95% CI of the mean-values. The dotted green line shows the expected BA.1 concentration. Om2 = BA.2, delta = B.1.617.2.

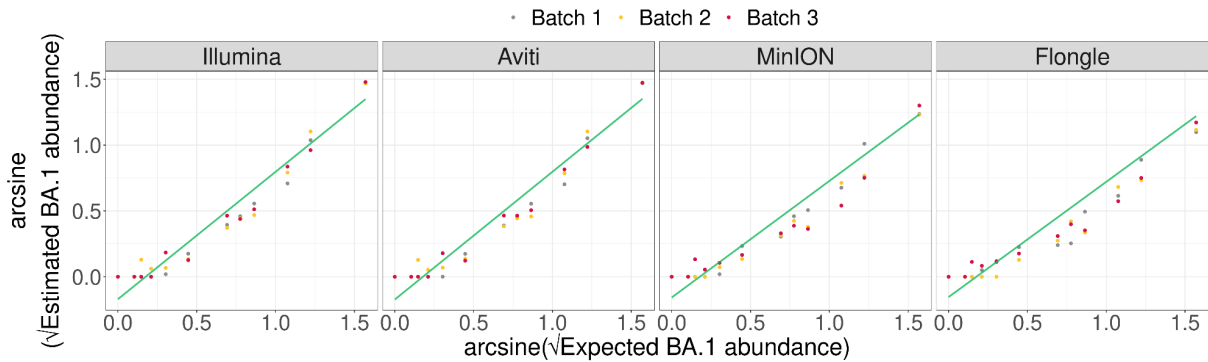

**Supplementary Figure I: Comparison of expected and estimated BA.1 abundance for re-normalized data on arcsine-square root scale.** The green line represents the derived linear model, for more information see Methods.

|                               | <b>Coefficient</b> | <b>Estimate</b> | <b>Std. Error</b> | <b>t-value</b> | <b>p-value</b>      |
|-------------------------------|--------------------|-----------------|-------------------|----------------|---------------------|
| <b>MinION<br/>(reference)</b> | intercept          | -0.127254       | 0.026004          | -4.8936        | <b>2.758e-06</b>    |
|                               | slope              | 0.772821        | 0.045681          | 16.9177        | <b>&lt; 2.2e-16</b> |
| <b>Illumina</b>               | intercept          | -0.031979       | 0.040441          | -0.7908        | 0.43046             |
|                               | slope              | 0.153231        | 0.066049          | 2.3200         | <b>0.02183</b>      |
| <b>Flongle</b>                | intercept          | 0.018164        | 0.034230          | 0.5306         | 0.59654             |
|                               | slope              | -0.069811       | 0.058266          | -1.1981        | 0.23294             |
| <b>Aviti</b>                  | intercept          | -0.033830       | 0.040613          | -0.8330        | 0.40632             |
|                               | slope              | 0.154726        | 0.066051          | 2.3425         | <b>0.02060</b>      |

**Supplementary Table A: Table stating linear model parameters with MinION as reference factor level determined from spike-in samples.** These parameters are used to display the response curves in Figure 5B. Significant levels were determined using a two-sided t-test.



|                                | Coefficient | Estimate  | Std. Error | t-value | p-value             |
|--------------------------------|-------------|-----------|------------|---------|---------------------|
| <b>Flongle<br/>(reference)</b> | intercept   | -0.109091 | 0.022259   | -4.9009 | <b>2.672e-06</b>    |
|                                | slope       | 0.703010  | 0.036169   | 19.4370 | <b>&lt; 2.2e-16</b> |
| <b>Illumina</b>                | intercept   | -0.050143 | 0.038141   | -1.3147 | 0.1908381           |
|                                | slope       | 0.223043  | 0.059865   | 3.7257  | <b>0.0002846</b>    |
| <b>MinION</b>                  | intercept   | -0.018164 | 0.034230   | -0.5306 | 0.5965397           |
|                                | slope       | 0.069811  | 0.058266   | 1.1981  | 0.2329437           |
| <b>Aviti</b>                   | intercept   | -0.051993 | 0.038323   | -1.3567 | 0.1771243           |
|                                | slope       | 0.224537  | 0.059868   | 3.7506  | <b>0.0002602</b>    |

**Supplementary Table B: Table stating linear model parameters with Flongle as reference factor level determined from spike-in samples.** Significant levels were determined using a two-sided t-test.

|                               | <b>Coefficient</b> | <b>Estimate</b> | <b>Std. Error</b> | <b>t-value</b> | <b>p-value</b>      |
|-------------------------------|--------------------|-----------------|-------------------|----------------|---------------------|
| <b>MinION<br/>(reference)</b> | intercept          | -0.1576217      | 0.0329275         | -4.7869        | <b>4.359e-06</b>    |
|                               | slope              | 0.8851541       | 0.0610747         | 14.4930        | <b>&lt; 2.2e-16</b> |
| <b>Illumina</b>               | intercept          | -0.0128718      | 0.0473792         | -0.2717        | 0.7863              |
|                               | slope              | 0.0821092       | 0.0826288         | 0.9937         | 0.3221              |
| <b>Flongle</b>                | intercept          | 0.0035631       | 0.0465183         | 0.0766         | 0.9391              |
|                               | slope              | -0.0103122      | 0.0854885         | -0.1206        | 0.9042              |
| <b>Aviti</b>                  | intercept          | -0.015302       | 0.0475985         | -0.3215        | 0.7483              |
|                               | slope              | 0.0850477       | 0.0827049         | 1.0283         | 0.3056              |

**Supplementary Table C: Table stating linear model parameters with MinION as reference factor level determined from re-normalised spike-in samples.** These parameters are used to display the response curves in Supplementary Figure E. Significant levels were determined using a two-sided t-test.

|                            | <b>Coefficient</b> | <b>Estimate</b> | <b>Std. Error</b> | <b>t-value</b> | <b>p-value</b>      |
|----------------------------|--------------------|-----------------|-------------------|----------------|---------------------|
| <b>Flongle (reference)</b> | intercept          | -0.1540585      | 0.0328593         | -4.6884        | <b>6.613e-06</b>    |
|                            | slope              | 0.8748419       | 0.0598178         | 14.6251        | <b>&lt; 2.2e-16</b> |
| <b>Illumina</b>            | intercept          | -0.0164350      | 0.0473319         | -0.3472        | 0.7290              |
|                            | slope              | 0.0924214       | 0.0817042         | 1.1312         | 0.2600              |
| <b>MinION</b>              | intercept          | -0.0035631      | 0.0465183         | -0.0766        | 0.9391              |
|                            | slope              | 0.0103122       | 0.0854885         | 0.1206         | 0.9042              |
| <b>Aviti</b>               | intercept          | -0.0188652      | 0.0475514         | -0.3967        | 0.6922              |
|                            | slope              | 0.0953599       | 0.0817811         | 1.1660         | 0.2456              |

**Supplementary Table D: Table stating linear model parameters with Flongle as reference factor level determined from re-normalised spike-in samples.** Significant levels were determined using a two-sided t-test.

| MinION                 | Coefficient | Estimate   | Std. Error | t-value | p-value            | Number of 'passed' reads |
|------------------------|-------------|------------|------------|---------|--------------------|--------------------------|
| <b>5 h (reference)</b> | intercept   | -0.130156  | 0.031772   | -4.2586 | <b>4.027e-05</b>   | 3747044                  |
|                        | slope       | 0.7770553  | 0.0500585  | 15.5230 | <b>&lt;2.2e-16</b> |                          |
| <b>10 h</b>            | intercept   | 0.0050643  | 0.0421691  | 0.1201  | 0.9046             | 2631387                  |
|                        | slope       | -0.0023326 | 0.0698824  | -0.0334 | 0.9734             |                          |
| <b>15 h</b>            | intercept   | 0.0066611  | 0.0418917  | 0.1590  | 0.8739             | 1819991                  |
|                        | slope       | -0.0041478 | 0.0697517  | -0.0595 | 0.9527             |                          |
| <b>max h</b>           | intercept   | 0.0029020  | 0.0401504  | 0.0723  | 0.9425             | 7051031                  |
|                        | slope       | -0.0042343 | 0.0678083  | -0.0624 | 0.9503             |                          |

**Supplementary Table E: Table stating linear model parameters with 5 h run-time as reference factor level determined from MinION time subsampled spike-in samples. Significant levels were determined using a two-sided t-test.**

| Flongle                | Coefficient | Estimate   | Std. Error | t-value | p-value            | Number of 'passed' reads |
|------------------------|-------------|------------|------------|---------|--------------------|--------------------------|
| <b>5 h (reference)</b> | intercept   | -0.1106250 | 0.0305631  | -3.6196 | <b>0.0004152</b>   | 215592                   |
|                        | slope       | 0.7059255  | 0.0500585  | 14.1020 | <b>&lt; 2.2e-1</b> |                          |
| <b>10 h</b>            | intercept   | 0.0028492  | 0.0421691  | 0.0676  | 0.9462311          | 99593                    |
|                        | slope       | -0.0026447 | 0.0698824  | -0.0378 | 0.9698670          |                          |
| <b>15 h</b>            | intercept   | 0.0015978  | 0.0418917  | 0.0381  | 0.9696303          | 69256                    |
|                        | slope       | -0.0012549 | 0.0697517  | -0.0180 | 0.9856723          |                          |
| <b>max h</b>           | intercept   | 0.0015343  | 0.0401504  | 0.0382  | 0.9695737          | 38752                    |
|                        | slope       | -0.0029159 | 0.0678083  | -0.0430 | 0.9657630          |                          |

**Supplementary Table F: Table stating linear model parameters with 5 h run-time as reference factor level determined from Flongle time subsampled spike-in samples. Significant levels were determined using a two-sided t-test.**
